# Supplementary material for: Self-assembly of a hydrophobically end-capped charged amphiphilic triblock copolymer: effects of temperature and salinity
Source: Royal Society of Chemistry journal article supplement (doi:10.1039/c5ra07657a), 2015-01-01
Supplement: c5ra07657a1.pdf [file c5ra07657a1.pdf]

### Supplementary information

**Table S1.** Specific volumes of C<sub>18</sub>, PEG, PNIPAAm, and PAMPS at various temperatures

| Temperature[°C] | V <sub>C<sub>18</sub></sub> [cm <sup>3</sup> /g] | V <sub>PEG</sub> [cm <sup>3</sup> /g] | V <sub>PNIPAAm</sub> [cm <sup>3</sup> /g] | V <sub>PAMPS</sub> [cm <sup>3</sup> /g] |
|-----------------|--------------------------------------------------|---------------------------------------|-------------------------------------------|-----------------------------------------|
| 10              | 1.243                                            | 0.823                                 | 0.86664                                   | 0.57104                                 |
| 15              | 1.259                                            | 0.8274                                | 0.87038                                   | 0.57403                                 |
| 20              | 1.272                                            | 0.8318                                | 0.87445                                   | 0.57779                                 |
| 25              | 1.281                                            | 0.8359                                | 0.87842                                   | 0.58117                                 |
| 30              | 1.29                                             | 0.8397                                | 0.8821                                    | 0.58526                                 |
| 35              | 1.3                                              | 0.8435                                | 0.89626                                   | 0.5762                                  |
| 40              | 1.308                                            | 0.8477                                | 0.90195                                   | 0.58557                                 |
| 45              | 1.315                                            | 0.852                                 | 0.90244                                   | 0.59944                                 |
| 50              | 1.322                                            | 0.8561                                | 0.90389                                   | 0.6137                                  |

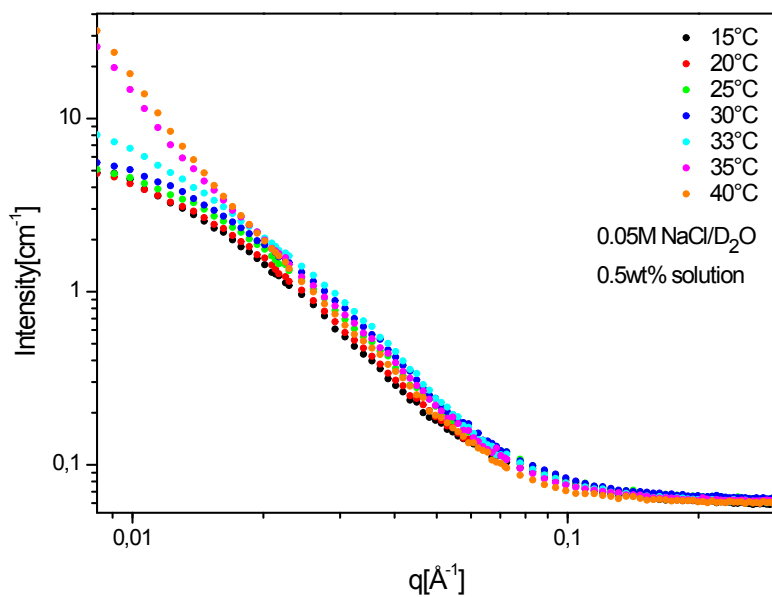

**Figure S1.** SANS patterns of 0.5wt% C<sub>18</sub>-PEG10-b-PNIPAAm<sub>54</sub>-b-PAMPS<sub>10</sub> in 0.05M NaCl in a temperature range of 15 to 40°C.

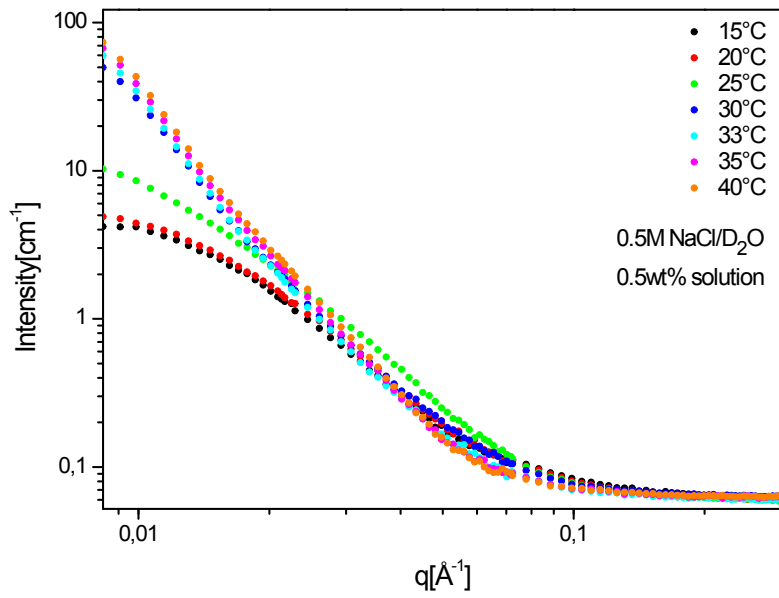

**Figure S2.** SANS patterns of 0.5wt% C<sub>18</sub>-PEG10-b-PNIPAAm<sub>54</sub>-b-PAMPS<sub>10</sub> in 0.5M NaCl in a temperature range of 15 to 40°C.
